# Supplementary material for: Behavioral Health Care Quality Among Marketplace Insurers in 2019
Source: Atypon-hosted journal article supplement (doi:10.1176/appi.ps.202000115), 2020-12-18
Supplement: appi.ps.202000115.ds001.pdf [file appi.ps.202000115.ds001.pdf]

 


Psychiatry Online
