# Supplementary material for: Behavioral Health Care Quality Among Marketplace Insurers in 2019
Source: Atypon-hosted journal article supplement (doi:10.1176/appi.ps.202000115), 2020-12-18
Supplement: appi.ps.202000115.ds001.pdf [file appi.ps.202000115.ds001.pdf]

## Supplemental Online Material: Appendix

Appendix Table 1. Correlation Between Behavioral Healthcare Quality Measures<sup>a</sup>

| Behavioral Healthcare Quality Measures                                                |             | Antidepressant Medication Management | Follow-Up After Hospitalization for Mental Illness | Follow-Up Care for Children Prescribed ADHD Medication | Initiation and Engagement of Alcohol and Other Drug Dependence Treatment |
|---------------------------------------------------------------------------------------|-------------|--------------------------------------|----------------------------------------------------|--------------------------------------------------------|--------------------------------------------------------------------------|
| Antidepressant Medication Management <sup>b</sup>                                     | Coefficient | 1                                    |                                                    |                                                        |                                                                          |
|                                                                                       | P value     |                                      |                                                    |                                                        |                                                                          |
| Follow-Up After Hospitalization for Mental Illness <sup>c</sup>                       | Coefficient | 0.33                                 | 1                                                  |                                                        |                                                                          |
|                                                                                       | P value     | <0.001                               |                                                    |                                                        |                                                                          |
| Follow-Up Care for Children Prescribed ADHD Medication <sup>d</sup>                   | Coefficient | 0.13                                 | 0.22                                               | 1                                                      |                                                                          |
|                                                                                       | P value     | 0.08                                 | 0.002                                              |                                                        |                                                                          |
| Initiation and Engagement of Alcohol and Other Drug Dependence Treatment <sup>e</sup> | Coefficient | 0.09                                 | 0.27                                               | 0.15                                                   | 1                                                                        |
|                                                                                       | P value     | 0.23                                 | <0.001                                             | 0.04                                                   |                                                                          |

<sup>a</sup> Data are from Centers for Medicare and Medicaid Services Quality Rating System 2019 database. Insurer types are identified with the 2016 National Association of Insurance Commissioners report and the Robert Wood Johnson Foundation's Marketplace insurer type data. Non-profit and preferred provider organization are not mutually exclusive; Medicaid managed care and Blue Cross affiliate are mutually exclusive to one another. Spearman rank correlation coefficients are shown.

<sup>b</sup> The percentage of members 18 years of age and older who were treated with antidepressant medication, had a diagnosis of major depression and who remained on an antidepressant medication treatment.

<sup>c</sup> The percentage of discharges for members 6 years of age and older who were hospitalized for treatment of selected mental illness or intentional self-harm diagnoses and who had a follow-up visit with a mental health practitioner within 7 days after discharge.

<sup>d</sup> The percentage of children newly prescribed attention-deficit/hyperactivity disorder (ADHD) medication who had at least three follow-up care visits within a 10-month period, one of which was within 30 days of when the first ADHD medication was dispensed.

<sup>e</sup> The percentage of adolescent and adult members with a new episode of alcohol or other drug (AOD) abuse or dependence who received 1) Initiation of AOD Treatment. The percentage of members who initiate treatment through an inpatient AOD admission, outpatient visit, intensive outpatient encounter or partial hospitalization, telehealth or medication treatment within 14 days of the diagnosis, and 2) Engagement of AOD Treatment. The percentage of members who initiated treatment and who had two or more additional AOD services or medication treatment within 34 days of the initiation visit.
